# Supplementary material for: Study protocol of the German "Registry for the Detection of Late Sequelae after Radiotherapy in Childhood and Adolescence" (RiSK)
Source: PubMed Central journal article supplement (PMC2373793; doi:10.1186/1748-717x-3-10), 2008-04-21
Supplement: 1748-717X-3-10-S1.pdf [file 1748-717X-3-10-S1.pdf]

# RiSK

## RADIOTHERAPY – Documentation form

-

Primary therapy:  Relapse therapy:

Name, Surname: .....

DOB: \_\_\_\_ . \_\_\_\_ . \_\_\_\_ Sex:  male  female

Address: .....

Diagnosis: .....

Therapy protocol: .....

Department of Pediatric Oncology: .....

.....  
 .....  
 .....

Department of Radiotherapy: .....

.....  
 .....  
 .....

Tumor location: .....

Target of Radiotherapy: .....

(For details see list on page 5)

Functional impairment within the treatment area before radiotherapy:  no

yes: .....

.....

Functional impairment outside the treatment area before radiotherapy:  no

yes: .....

.....

Height before start of radiotherapy (cm): \_\_\_\_\_ Height if seated before radiotherapy (cm)  
 (in case of radiation of spinal axis): \_\_\_\_\_

Weight before start of radiotherapy (kg): \_\_\_\_\_

Documentation forms should be sent back to the following address:

RiSK study trial center, Department of Radiotherapy, University Hospital of Münster, Albert-Schweitzer-Str.33, D-48129 Münster, Germany; Phone: +49-251-83-47384; Fax: +49-251-83-47355; Email: [radtox@uni-muenster.de](mailto:radtox@uni-muenster.de)

**Radiation planning (in case of 2 localizations please use a second table)**

|                                           | <b>Target volume I</b>                                                                                                   | <b>Target volume II<br/>(e.g. shrinking field,<br/>boost)</b>                                                            | <b>Target volume III<br/>(e.g. shrinking field,<br/>boost)</b>                                                           |
|-------------------------------------------|--------------------------------------------------------------------------------------------------------------------------|--------------------------------------------------------------------------------------------------------------------------|--------------------------------------------------------------------------------------------------------------------------|
| Irradiated organ area:                    |                                                                                                                          |                                                                                                                          |                                                                                                                          |
|                                           | <input type="checkbox"/> single field<br><input type="checkbox"/> opposing fields<br><input type="checkbox"/> > 2 fields | <input type="checkbox"/> single field<br><input type="checkbox"/> opposing fields<br><input type="checkbox"/> > 2 fields | <input type="checkbox"/> single field<br><input type="checkbox"/> opposing fields<br><input type="checkbox"/> > 2 fields |
| No. of treatment fields:                  |                                                                                                                          |                                                                                                                          |                                                                                                                          |
| Non-coplanar fields?                      | <input type="checkbox"/> yes <input type="checkbox"/> no                                                                 | <input type="checkbox"/> yes <input type="checkbox"/> no                                                                 | <input type="checkbox"/> yes <input type="checkbox"/> no                                                                 |
| Coplanar fields?                          | <input type="checkbox"/> yes <input type="checkbox"/> no                                                                 | <input type="checkbox"/> yes <input type="checkbox"/> no                                                                 | <input type="checkbox"/> yes <input type="checkbox"/> no                                                                 |
| Isodose plan?                             | <input type="checkbox"/> yes <input type="checkbox"/> no                                                                 | <input type="checkbox"/> yes <input type="checkbox"/> no                                                                 | <input type="checkbox"/> yes <input type="checkbox"/> no                                                                 |
| CT/MRI – based?                           | <input type="checkbox"/> yes <input type="checkbox"/> no                                                                 | <input type="checkbox"/> yes <input type="checkbox"/> no                                                                 | <input type="checkbox"/> yes <input type="checkbox"/> no                                                                 |
| 3- D planning?                            | <input type="checkbox"/> yes <input type="checkbox"/> no                                                                 | <input type="checkbox"/> yes <input type="checkbox"/> no                                                                 | <input type="checkbox"/> yes <input type="checkbox"/> no                                                                 |
| Dose volume histogram?                    | <input type="checkbox"/> yes <input type="checkbox"/> no                                                                 | <input type="checkbox"/> yes <input type="checkbox"/> no                                                                 | <input type="checkbox"/> yes <input type="checkbox"/> no                                                                 |
|                                           |                                                                                                                          |                                                                                                                          |                                                                                                                          |
| Prescription according to ICRU 50 report? | <input type="checkbox"/> yes <input type="checkbox"/> no                                                                 | <input type="checkbox"/> yes <input type="checkbox"/> no                                                                 | <input type="checkbox"/> yes <input type="checkbox"/> no                                                                 |
| Surrounding isodose:                      | %                                                                                                                        | %                                                                                                                        | %                                                                                                                        |
| Dosage on ½ diameter?                     | <input type="checkbox"/> yes <input type="checkbox"/> no                                                                 | <input type="checkbox"/> yes <input type="checkbox"/> no                                                                 | <input type="checkbox"/> yes <input type="checkbox"/> no                                                                 |
| Dosage Depth:                             | cm                                                                                                                       | cm                                                                                                                       | cm                                                                                                                       |
| Other dosage system:                      |                                                                                                                          |                                                                                                                          |                                                                                                                          |
| Simulation?                               | <input type="checkbox"/> yes <input type="checkbox"/> no                                                                 | <input type="checkbox"/> yes <input type="checkbox"/> no                                                                 | <input type="checkbox"/> yes <input type="checkbox"/> no                                                                 |
| Cobalt 60?                                | <input type="checkbox"/> yes <input type="checkbox"/> no                                                                 | <input type="checkbox"/> yes <input type="checkbox"/> no                                                                 | <input type="checkbox"/> yes <input type="checkbox"/> no                                                                 |
| Linac- Photons?                           | <input type="checkbox"/> yes <input type="checkbox"/> no                                                                 | <input type="checkbox"/> yes <input type="checkbox"/> no                                                                 | <input type="checkbox"/> yes <input type="checkbox"/> no                                                                 |
| Linac-Electrons:                          | <input type="checkbox"/> yes <input type="checkbox"/> no                                                                 | <input type="checkbox"/> yes <input type="checkbox"/> no                                                                 | <input type="checkbox"/> yes <input type="checkbox"/> no                                                                 |
| Energy:                                   | ____ MeV                                                                                                                 | ____ MeV                                                                                                                 | ____ MeV                                                                                                                 |
| Neutrons?                                 | <input type="checkbox"/> yes <input type="checkbox"/> no                                                                 | <input type="checkbox"/> yes <input type="checkbox"/> no                                                                 | <input type="checkbox"/> yes <input type="checkbox"/> no                                                                 |
| Protons?                                  | <input type="checkbox"/> yes <input type="checkbox"/> no                                                                 | <input type="checkbox"/> yes <input type="checkbox"/> no                                                                 | <input type="checkbox"/> yes <input type="checkbox"/> no                                                                 |
| Mixed technique?                          | <input type="checkbox"/> yes <input type="checkbox"/> no                                                                 | <input type="checkbox"/> yes <input type="checkbox"/> no                                                                 | <input type="checkbox"/> yes <input type="checkbox"/> no                                                                 |
| Bolus material?                           | <input type="checkbox"/> yes <input type="checkbox"/> no                                                                 | <input type="checkbox"/> yes <input type="checkbox"/> no                                                                 | <input type="checkbox"/> yes <input type="checkbox"/> no                                                                 |
| Stereotact. irradiation?                  | <input type="checkbox"/> yes <input type="checkbox"/> no                                                                 | <input type="checkbox"/> yes <input type="checkbox"/> no                                                                 | <input type="checkbox"/> yes <input type="checkbox"/> no                                                                 |

**Other irradiation techniques**

- Brachytherapy:  
 endoluminal     interstitial     Flab-Technique     Seed-Implantation
- Intraoperative Radiotherapy (IORT)  
 Electrons     Brachytherapy (Flab)
- open radionuclides

- Positioning help (which one?)  fixation mask       Vacuum cushion       plaster cushion  
 Sedation/short narcosis       Stereotactic fixation ring  
 other:.....

**Radiation planning (in case of 2 localizations please use a second table)**

|                                                  | Target volume I                                                                                                      | Target volume II                                                                                                     | Target volume III                                                                                                    |
|--------------------------------------------------|----------------------------------------------------------------------------------------------------------------------|----------------------------------------------------------------------------------------------------------------------|----------------------------------------------------------------------------------------------------------------------|
| Start of treatment:                              |                                                                                                                      |                                                                                                                      |                                                                                                                      |
| End of treatment:                                |                                                                                                                      |                                                                                                                      |                                                                                                                      |
| No. of treatment days:                           |                                                                                                                      |                                                                                                                      |                                                                                                                      |
| Treatment pauses:                                | <input type="checkbox"/> yes , <input type="checkbox"/> <input type="checkbox"/> days<br><input type="checkbox"/> no | <input type="checkbox"/> yes , <input type="checkbox"/> <input type="checkbox"/> days<br><input type="checkbox"/> no | <input type="checkbox"/> yes , <input type="checkbox"/> <input type="checkbox"/> days<br><input type="checkbox"/> no |
| Reason:                                          |                                                                                                                      |                                                                                                                      |                                                                                                                      |
| Cumulative radiation dose in target volume (Gy): |                                                                                                                      |                                                                                                                      |                                                                                                                      |
| Single fraction dose (Gy):                       |                                                                                                                      |                                                                                                                      |                                                                                                                      |
| Fractionation schedule::                         | x      Gy /Week                                                                                                      | x      Gy /Week                                                                                                      | x      Gy /Week                                                                                                      |

Notices:.....

Total body irradiation (TBI):

Date of treatment:.....

|                         |                      |              |  |
|-------------------------|----------------------|--------------|--|
| Single dose (Gy) :      |                      | Lung dose:   |  |
| Fractionation schedule: | ..... x..... Gy /Tag | Liver dose:  |  |
| TBI total dose          |                      | Kidney dose: |  |
| Dose / time:            |                      |              |  |

**Has radiotherapy been performed earlier?**

no

yes

if yes, target volume:.....

Dose:.....Gy

Year of irradiation:.....

Surgery in irradiated volume:            yes             no             unknown  
 performed before radiotherapy:        yes             no  
 planned after radiotherapy:            yes             no

Kind of Surgery:.....

Chemotherapy before radiotherapy :    yes             no             unknown

Substances.....

.....

Chemotherapy simultaneously to radiotherapy :    yes             no             unknown

Substances.....

.....

Chemotherapy after radiotherapy :            yes             no             unknown

Substances.....

.....

Therapy associated acute toxicity EORTC / RTOG Grade 3 or 4 during radiotherapy:

a).....

b).....

c).....

.....  
Date

.....  
Name of Physician

.....  
Signature / stamp

### List of treatment volumes

|    |                               |  |    |                            |
|----|-------------------------------|--|----|----------------------------|
| 1  | Skin                          |  |    | <b>Abdomen</b>             |
| 2  | Total body                    |  | 42 | abdomen                    |
| 3  | Half body                     |  | 43 | liver                      |
|    | <b>CNS</b>                    |  | 44 | liver hilus                |
| 81 | craniospinal axis             |  | 45 | splen, splen hilus         |
| 4  | whole brain                   |  | 46 | stomach                    |
| 5  | cerebrum                      |  | 47 | paraaortal lymph nodes     |
| 6  | cerebellum                    |  | 48 | pankreas                   |
| 7  | brainstem                     |  | 49 | kidney                     |
| 8  | hypophysis                    |  | 50 | adrenal gland              |
| 9  | pinealis                      |  | 51 | iliacal lymph nodes        |
| 10 | suprasellar region            |  | 52 | inguinal lymph nodes       |
| 11 | bones of skull                |  | 53 | small pelvis               |
| 12 | ethmoidal sinus               |  | 54 | pelvic wall                |
| 13 | orbita                        |  | 55 | rectum                     |
| 14 | retrobulbic region            |  | 56 | pre-sacrum region          |
|    | <b>Head/Neck</b>              |  | 57 | anal                       |
| 15 | cheek                         |  | 58 | bladder                    |
| 16 | Waldeyer's ring in the throat |  | 59 | prostate                   |
| 17 | tonsilla                      |  | 60 | testicles                  |
| 18 | thyreoid gland                |  | 61 | uterus                     |
| 19 | epipharyngeal region          |  | 62 | parametrium                |
| 20 | mesopharyngeal region         |  | 63 | ovary                      |
| 21 | hypophayngeal region          |  | 64 | vagina                     |
| 22 | maxilla                       |  | 65 | vulva                      |
| 23 | mandibula                     |  |    | <b>Spinal cord + spine</b> |
| 24 | sinus maxillaris              |  | 66 | myelon                     |
| 25 | tongue                        |  | 67 | cervical spine             |
| 26 | mouth soil                    |  | 68 | thoracic spine             |
| 27 | larynx                        |  | 69 | lumbal spine               |
| 28 | submental lymph nodes         |  | 70 | sacrum                     |
| 29 | cervical lymph nodes          |  | 71 | paravertebral region       |
| 30 | supra-/infraclavicular LN     |  |    | <b>Extremities</b>         |
|    | <b>Thorax</b>                 |  | 72 | shoulder / Neck            |
| 31 | mediastinum                   |  | 73 | upper arm                  |
| 32 | hilomediastinal               |  | 74 | forearm                    |
| 33 | hilus                         |  | 75 | hand                       |
| 34 | esophagus                     |  | 76 | hip                        |
| 35 | heart                         |  | 77 | upper leg                  |
| 36 | whole lung                    |  | 78 | lower leg                  |
| 37 | central lung                  |  | 79 | foot                       |
| 38 | peripher lung                 |  |    |                            |
| 39 | chest wall                    |  | 80 | other:                     |
| 40 | mamma                         |  |    |                            |
| 41 | axilla                        |  |    |                            |

# RiSK

## RADIOTHERAPY – DOCUMENTATION FORM

### - Organ dose levels -

#### Guidelines for documentation

- **On the following pages only radiation doses of organs / areas in the radiation field should be given. Radiation dose exposures outside the radiation fields should be given only for ovaries / testicles and the thyroid gland.**
- **For thyroid gland and testicles dose measurements (e.g. by thermoluminescence dosimetry) are planned.** If possible, several measurements points should be spread over the organ. In case of one single measurement point this point should be placed at a representative point in the middle of the organ.
- **For lung, heart, liver and kidneys the organ dose levels have to be taken from dose-volume-histograms of the treatment plan.**
- **D-max: maximal punctual dose in the organ**  
**D-min: minimal punctual dose in the organ**
- **I. Part: Documentation of doses at bones, soft tissues and joints**  
**II. Part: Documentation of organs, listed from cranial to caudal.**

**I. Part****Bone marrow**

|                                      |
|--------------------------------------|
| <b>Please mark the field contour</b> |
|--------------------------------------|

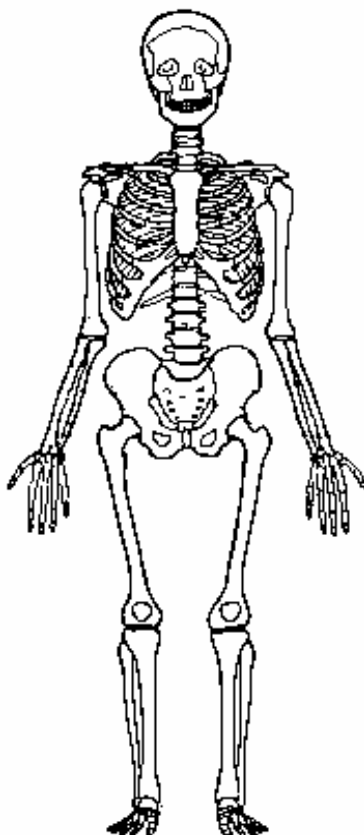

(Please mark the field contour)

**Spine and spinal cord**

|                                                                                                     |
|-----------------------------------------------------------------------------------------------------|
| <b>Dose documentation and toxicity follow-up for vertebrae and spinal cord for doses &gt; 10 Gy</b> |
|-----------------------------------------------------------------------------------------------------|

**Irradiated vertebrae:** from.....to.....

D-max in irradiated vertebrae: .....Gy

D-min in irradiated vertebrae:.....Gy

**Dose gradient below 20Gy in the vertebrae?** yes no**Irradiated segments of spinal cord:** from.....to.....

D-max in irradiated segments: .....Gy

D-min in irradiated segments:.....Gy

### BONES AND SOFT TISSUE

**Dose documentation and toxicity follow up if irradiated with  $\geq 10$  Gy**

|                 | D-max (Gy) | Whole bone in target volume? |
|-----------------|------------|------------------------------|
| Bones of skull  |            | _____                        |
| Ribs right side |            | _____                        |
| Ribs left side  |            | _____                        |
| Pelvis right    |            |                              |
| Pelvis left     |            |                              |
| Sacrum          |            |                              |

|               | D-max (Gy) | Whole bone in PTV? |    | Proximal epiphysis interstice in field? |         |       | Distal epiphysis interstice in field? |         |       |
|---------------|------------|--------------------|----|-----------------------------------------|---------|-------|---------------------------------------|---------|-------|
|               |            | yes                | no | yes                                     | partial | no    | yes                                   | partial | no    |
| Humerus right |            |                    |    |                                         |         |       |                                       |         |       |
| Radius right  |            |                    |    |                                         |         |       |                                       |         |       |
| Ulna right    |            |                    |    |                                         |         |       |                                       |         |       |
| Hand right    |            |                    |    | _____                                   | _____   | _____ | _____                                 | _____   | _____ |
| Femur right   |            |                    |    |                                         |         |       |                                       |         |       |
| Tibia right   |            |                    |    |                                         |         |       |                                       |         |       |
| Fibula right  |            |                    |    |                                         |         |       |                                       |         |       |
| Foot right    |            |                    |    | _____                                   | _____   | _____ | _____                                 | _____   | _____ |
| Humerus left  |            |                    |    |                                         |         |       |                                       |         |       |
| Radius left   |            |                    |    |                                         |         |       |                                       |         |       |
| Ulna left     |            |                    |    |                                         |         |       |                                       |         |       |
| Hand left     |            |                    |    | _____                                   | _____   | _____ | _____                                 | _____   | _____ |
| Femur left    |            |                    |    |                                         |         |       |                                       |         |       |
| Tibia left    |            |                    |    |                                         |         |       |                                       |         |       |
| Fibula left   |            |                    |    |                                         |         |       |                                       |         |       |
| Foot left     |            |                    |    | _____                                   | _____   | _____ | _____                                 | _____   | _____ |

**Complete circumference of the extremity in field:**  yes (without lymphatic space)  no

### JOINTS

**Dose documentation and toxicity follow-up if irradiated with  $\geq 20$  Gy**

**Joints in radiation field:**  no  yes

|                     | Right (Gy) | Left (Gy) |
|---------------------|------------|-----------|
| Shoulder            |            |           |
| Elbow               |            |           |
| Hand (radio-carpal) |            |           |
| Hip                 |            |           |
| Knee                |            |           |
| Ankle joint         |            |           |



## II. Part (Organ dose levels)

### CNS

#### Dose documentation and toxicity follow up if in target volume

Whole brain irradiation (CNS prophylaxis / CNS- manifestation in case of ALL / AML)

Planned dose:.....Gy

Dosimetry thyroid gland: measured total dose:...../...../...../...../.....Gy

(or dose evaluation from treatment plan), alternative: distance between field border and thyroid gland: .....cm

(no further documentation necessary!!)

Whole brain irradiation      planned dose:..... Gy

cranio-spinal axis radiation      planned dose:..... Gy

Boost spinal:             no                                     yes: cumulative dose:.....Gy

Myelon segment:.....

Boost cerebral:         no                                     yes: cumulative dose.....Gy

region:.....

Radiation of parts of the brain:

< 20 Gy → no documentation necessary

> 20 Gy

|              | D-max (Gy) | D-min (Gy) |
|--------------|------------|------------|
| Hypophysis   |            |            |
| Optic chiasm |            |            |
| Brainstem    |            |            |

Spinal cord: see Part I

### ORBITA

#### Dose documentation and toxicity follow-up for any dose given

|                   | D-max (Gy) | Whole organ in PTV? |    |                  | D-max (Gy) | Whole organ in PTV? |    |
|-------------------|------------|---------------------|----|------------------|------------|---------------------|----|
|                   |            | yes                 | no |                  |            | yes                 | no |
| Eye right         |            |                     |    | Eye left         |            |                     |    |
| Lens right        |            |                     |    | Lens left        |            |                     |    |
| Tear gland right  |            |                     |    | Tear gland left  |            |                     |    |
| Optic nerve right |            |                     |    | Optic nerve left |            |                     |    |

### EYE

#### Dose documentation and toxicity follow-up for any given dose

|                | D-max (Gy) |                | D-max (Gy) |
|----------------|------------|----------------|------------|
| Middle ear ri. |            | Middle ear l.  |            |
| Inner ear ri.  |            | Inner ear left |            |

Parallel chemotherapy with Cisplatin:

yes                                     no

## SALIVARY GLANDS

**Dose documentation and toxicity follow-up if irradiated with  $\geq 20$  Gy**

|                         | D-max (Gy) | Complete in field?           |                             |
|-------------------------|------------|------------------------------|-----------------------------|
| Gl. parotis ri.         |            | <input type="checkbox"/> yes | <input type="checkbox"/> no |
| Gl. submandibularis ri. |            | <input type="checkbox"/> yes | <input type="checkbox"/> no |
|                         |            |                              |                             |
| Gl. parotis le.         |            | <input type="checkbox"/> yes | <input type="checkbox"/> no |
| Gl. submandibularis le. |            | <input type="checkbox"/> yes | <input type="checkbox"/> no |

## TEETH / JAW

**Dose documentation and toxicity follow-up for any given dose.**

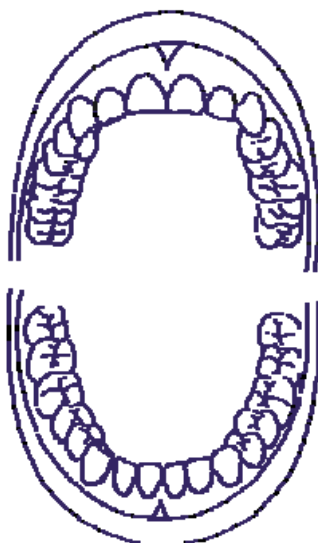

Please mark the irradiated region!

Jaw joint left in treatment field?     no                       yes, dose:.....Gy

Jaw joint right in treatment field?     no                       yes, dose:.....Gy

## THYROID GLAND

**Dose documentation and toxicity follow-up for any given dose.**

**Dosimetric evaluation of scattered dose, e.g. in case of brain or mediastinal irradiation; alternative: distance of organ from field border.**

**Thyroid gland in target volume**                                              D-max:.....Gy

Whole organ in target volume:     No                       Yes

**Thyroid gland not in target volume**

(in case of head/neck or mediastinal irradiation / cranio-spinal axis irradiation)

(several measurement points)

Dosimetry:     yes → measured total dose:...../...../...../...../.....Gy

(or dose evaluation from treatment plan)

no → Distance to field border:.....cm

**Larynx****Dose documentation and toxicity follow-up in case of irradiation  $\geq 20$  Gy.**

D-max: .....Gy

Part of irradiated organ volume  $\geq 20$  Gy:   $< 1/3$         $1/3 - 2/3$         $> 2/3$        complete**BREAST****Dose documentation and toxicity follow-up for any given dose.**

|              | D-max (Gy) | Whole breast in PTV |    |
|--------------|------------|---------------------|----|
|              |            | Yes                 | No |
| Breast right |            |                     |    |
|              |            |                     |    |
| Breast left  |            |                     |    |

Symmetric Irradiation of both breast:  yes       no**ESOPHAGUS****Dose documentation and toxicity follow-up in case of partial irradiation  $\geq 40$  Gy.**Part of esophagus with dose  $\geq 40$  Gy

from..... to ..... (Documentation of localization according to vertebrae)

D-max in irradiated segment: ..... Gy

**PANCREAS****Dose documentation and toxicity follow-up in case of partial irradiation  $\geq 20$  Gy**

D-max:.....Gy

Part of irradiated organ volume  $\geq 20$  Gy:   $< 1/3$   
  $1/3 - 2/3$   
  $> 2/3$   
 complete**URINARY BLADDER****Dose documentation and toxicity follow-up if in target volume.**D-max:.....Gy;      Urinary bladder complete in PTV:  no       yes

**DOSE-VOLUME-HISTOGRAM (DVH)**  
**HEART**

Dose documentation and toxicity follow-up if irradiated with  $\geq 15$  Gy. Evaluation also in case of infra-diaphragmal irradiation.

**LUNG**

Dose documentation and toxicity follow-up in case of whole lung irradiation  $\geq 10$  Gy or partial lung irradiation  $\geq 18$  Gy. Dose volume histogram!

**LIVER**

Dose documentation and toxicity follow-up in case of irradiation  $\geq 1/3$  of the liver and/or partial liver irradiation  $\geq 20$  Gy. Dose volume histogram!

**Kidneys**

Dose documentation and toxicity follow-up if  $\geq 1/2$  of one kidney is irradiated and/or a partial kidney dose  $\geq 12$  Gy has been reached. Dose volume histogram!

Alternative:  
DVH as a  
copy  
or  
fill out the  
table.

| Dose   | Heart | Lung<br>left | Lung<br>right | Whole<br>lung | Liver | Kidney<br>left | Kidney<br>right |
|--------|-------|--------------|---------------|---------------|-------|----------------|-----------------|
| > 5 Gy | %     | %            | %             | %             | %     | %              | %               |
| >10 Gy | %     | %            | %             | %             | %     | %              | %               |
| >15 Gy | %     | %            | %             | %             | %     | %              | %               |
| >20 Gy | %     | %            | %             | %             | %     | %              | %               |
| >30 Gy | %     | %            | %             | %             | %     | %              | %               |
| >40 Gy | %     | %            | %             | %             | %     | %              | %               |
| >50 Gy | %     | %            | %             | %             | %     | %              | %               |
| >60 Gy | %     | %            | %             | %             | %     | %              | %               |

**Pre-existing functional impairment of heart, lungs, liver or kidneys:**

no  yes:

.....  
.....

**BOWEL**

Dose documentation and toxicity follow-up in case of partial abdomen irradiation  $\geq 10$  Gy.

**Small intestine:** D-max:.....Gy

**Colon:** D-max:.....Gy

Part of irradiated volume  $\geq 20$  Gy:

Part of irradiated volume  $\geq 20$  Gy:

- < 1/3
- 1/3 – 2/3
- > 2/3
- complete

- < 1/3
- 1/3 – 2/3
- > 2/3
- complete

..

## VAGINA / UTERUS

### Dose documentation and toxicity follow-up if in PTV.

|        | Dose in PTV |
|--------|-------------|
| Vagina |             |
| Cervix |             |
| Uterus |             |

Part of Vagina in treated volume:

Partial irradiation       complete

## OVARIES

### Dose documentation and toxicity follow-up for any given dose.

**Ovary right:**  in radiation field, dose: → .....Gy  
 scattered dose: → .....Gy (Dose evaluation from treatment plan)

**Ovary left:**  in radiation field, dose: → .....Gy  
 scattered dose: → .....Gy (Dose evaluation from treatment plan)

**Ovary transposition:**  no       yes → **moved to:** .....

.....

## TESTICLES

### Dose documentation and toxicity follow-up for any dose given to the abdomen. Dosimetric evaluation of scattered dose in case of irradiation of pelvis or upper leg.

**Irradiation with testicle capsule?**  yes

no

**Testicle right:**

**Testicle left:**

in radiation field → .....Gy

in radiation field → .....Gy

Scattered dose: Dosimetry

Scattered dose: Dosimetry

yes → total dose

yes → total dose:

...../...../...../...../.....Gy

...../...../...../.....Gy

no → distance from field border (cm):.....

no → distance from field border:  
(cm):.....

.....  
**Date:**

.....  
**Name of Radiotherapist**  
(print letters)

.....  
**Signature / Stamp of institution**

| <input type="text"/> <input type="text"/> <input type="text"/> <input type="text"/><br>No.      Date                                     |                                                                  | <b>Max. acute side effects after radiotherapy<br/>           in childhood (adapted from RTOG/EORTC)</b>                                                                                                   |                                                                                                                                                                                        |                                                                                                                                                                                                                                                                                                                                                          | Pat.name, DOB:                                                                                                                                                                  |  |
|------------------------------------------------------------------------------------------------------------------------------------------|------------------------------------------------------------------|-----------------------------------------------------------------------------------------------------------------------------------------------------------------------------------------------------------|----------------------------------------------------------------------------------------------------------------------------------------------------------------------------------------|----------------------------------------------------------------------------------------------------------------------------------------------------------------------------------------------------------------------------------------------------------------------------------------------------------------------------------------------------------|---------------------------------------------------------------------------------------------------------------------------------------------------------------------------------|--|
| <b>General status,<br/>Karnofsky-Index</b>                                                                                               | <b>0</b> normal<br>KI: 100%                                      | <b>1</b> Mild reduced activity,<br>KI: 70–80%                                                                                                                                                             | <b>2</b> Reduced activity and<br>power, KI: 50–60%                                                                                                                                     | <b>3</b> Severe reduced activity and<br>power, KI: 30–40%                                                                                                                                                                                                                                                                                                | <b>4</b> Vital threatened,<br>KI: < 30%                                                                                                                                         |  |
| <b>Bone marrow</b><br>Leucocytes (N/ $\mu$ l)<br>Neutrophils (N/ $\mu$ l)<br>Thrombocytes ( $\cdot 10^3$ / $\mu$ l)<br>Hemoglobin (g/dl) | <b>0</b><br>$\geq 4.000$<br>$\geq 2.000$<br>$\geq 100$<br>normal | <b>1</b><br>3.000 - < 4.000<br>< 2.000 - 1.500<br>75 - < 100<br>10,0 - < N                                                                                                                                | <b>2</b><br>2.000 - < 3.000<br>< 1.500 - 1.000<br>50 - < 75<br>8,0 - < 10,0                                                                                                            | <b>3</b><br>1.0 - < 2.000<br>< 1.000 - 500<br>10,0 - < 50<br>6,5 - < 8,0                                                                                                                                                                                                                                                                                 | <b>4</b><br>< 1.000<br><500 / Sepsis<br>< 10,0<br>< 6,5                                                                                                                         |  |
| <b>Skin / Subcutis</b>                                                                                                                   | <b>0</b> normal                                                  | <b>1</b> Follicular, faint or dull<br>erythema/epilation/dry<br>desquamation/decreased<br>sweating                                                                                                        | <b>2</b> Tender or bright erythema,<br>patchy moist<br>desquamation/moderate<br>edema; (local therapy<br>necessary)                                                                    | <b>3</b> Confluent, moist<br>desquamation other than skin<br>folds, pitting edema<br>(intensive therapy necessary)                                                                                                                                                                                                                                       | <b>4</b> Ulceration, hemorrhage<br>or necrosis,<br>(operative therapy<br>necessary)                                                                                             |  |
| <b>Mucous<br/>membrane</b>                                                                                                               | <b>0</b> normal                                                  | <b>1</b> Injection/may experience<br>mild pain not requiring<br>analgesic.                                                                                                                                | <b>2</b> Patchy mucositis that may<br>produce an inflammatory sero-<br>sanguinous discharge/may<br>experience moderate pain<br>requiring analgesia                                     | <b>3</b> Confluent fibrinous<br>mucositis/may include severe<br>pain requiring narcotic                                                                                                                                                                                                                                                                  | <b>4</b> Ulceration, hemorrhage<br>or necrosis                                                                                                                                  |  |
| <b>Salivary glands</b>                                                                                                                   | <b>0</b> normal                                                  | <b>1</b> Mild mouth dryness/<br>slightly thickened saliva/may<br>have slightly altered taste                                                                                                              | <b>2</b> Moderate to complete<br>dryness/thick, sticky saliva /<br>markedly altered taste.                                                                                             | <b>3</b> Complete dryness                                                                                                                                                                                                                                                                                                                                | <b>4</b> Acute salivary gland<br>necrosis                                                                                                                                       |  |
| <b>Pharynx/<br/>Esophagus</b>                                                                                                            | <b>0</b> normal                                                  | <b>1</b> Mild dysphagia or<br>odynophagia/may require<br>topical anesthetic or non-<br>narcotic analgesics/may<br>require soft diet                                                                       | <b>2</b> Moderate dysphagia or<br>odynophagia/may require<br>narcotic analgesics/may require<br>puree or liquid diet                                                                   | <b>3</b> Severe dysphagia or<br>odynophagia with dehydration<br>or weight loss >15% from pre-<br>treatment baseline, requiring N-<br>G feeding tube, i.v. fluids or<br>hyperalimentation                                                                                                                                                                 | <b>4</b> Complete obstruction,<br>ulceration, perforation,<br>fistula                                                                                                           |  |
| <b>Larynx</b>                                                                                                                            | <b>0</b> normal                                                  | <b>1</b> Mild or intermittent<br>hoarseness/cough not<br>requiring antitussive /<br>erythema of mucosa                                                                                                    | <b>2</b> Persistent hoarseness but<br>able to vocalize, sore throat,<br>patchy fibrinous exudates or<br>mild arytenoids edema not<br>requiring narcotic/cough<br>requiring antitussive | <b>3</b> Whispered speech, throat<br>pain requiring narcotic /<br>confluent fibrinous exudates,<br>marked arytenoids edema                                                                                                                                                                                                                               | <b>4</b> Marked dyspnea, stridor<br>or hemoptysis with<br>tracheostomy or intubation<br>necessary                                                                               |  |
| <b>Lung</b>                                                                                                                              | <b>0</b> no change                                               | <b>1</b> Mild symptoms of dry<br>cough or dyspnea on<br>exertion                                                                                                                                          | <b>2</b> Persistent cough requiring<br>narcotic, antitussive agents /<br>dyspnea with minimal effort but<br>not at rest                                                                | <b>3</b> Severe cough unresponsive<br>to narcotic antitussive agent or<br>dyspnea at rest / clinical or<br>radiological evidence of acute<br>pneumonitis/intermittent oxygen<br>or steroids may be required                                                                                                                                              | <b>4</b> Severe respiratory<br>insufficiency / continuous<br>oxygen or assisted<br>ventilation                                                                                  |  |
| <b>Heart</b>                                                                                                                             | <b>0</b> Normal                                                  | <b>1</b> Asymptomatic but<br>objective evidence of ECG<br>changes or pericardial<br>abnormalities without<br>evidence of other heart<br>disease                                                           | <b>2</b> Symptomatic with ECG<br>changes and radiological<br>findings of congestive heart<br>failure or pericardial disease/no<br>specific treatment required                          | <b>3</b> Congestive heart failure,<br>angina pectoris, pericardial<br>disease responding to therapy                                                                                                                                                                                                                                                      | <b>4</b> Congestive heart<br>failure, angina pectoris,<br>pericardial disease,<br>arrhythmia not responsive<br>to non-surgical measures                                         |  |
| <b>Arrhythmia</b>                                                                                                                        | <b>0</b> none                                                    | <b>1</b> Asymptomatic, no<br>therapy                                                                                                                                                                      | <b>2</b> recurrent / persistent, no<br>therapy                                                                                                                                         | <b>3</b> Therapy required                                                                                                                                                                                                                                                                                                                                | <b>4</b> Hypotension, ventricular<br>Arrhythmia, defibrillation                                                                                                                 |  |
| <b>Cardiac<br/>function</b>                                                                                                              | <b>0</b> normal                                                  | <b>1</b> Asymptomat. EF $\downarrow$ (at rest)<br>> = 10 % but < 20 % of<br>baseline value                                                                                                                | <b>2</b> Asymptomat., but EF $\downarrow$ (at<br>rest) under upper limit for EF<br>(work) or EF $\downarrow$ > = 20 % of<br>baseline value                                             | <b>3</b> Mild CHF, compensated by<br>therapy                                                                                                                                                                                                                                                                                                             | <b>4</b> severe / refractive CHF<br>or need for intubation                                                                                                                      |  |
| <b>Echocardio: LV-<br/>SF %</b>                                                                                                          | <b>0</b> > = 30                                                  | <b>1</b> > = 24 - < 30                                                                                                                                                                                    | <b>2</b> > = 20 - < 24                                                                                                                                                                 | <b>3</b> > 15 - < 20                                                                                                                                                                                                                                                                                                                                     | <b>4</b> < = 15                                                                                                                                                                 |  |
| <b>Upper G.I.</b>                                                                                                                        | <b>0</b> normal                                                  | <b>1</b> Anorexia with $\leq$ 5%<br>weight loss from pre-<br>treatment baseline / nausea<br>not requiring antiemetics /<br>abdominal discomfort not<br>requiring parasympatholytic<br>drugs or analgesics | <b>2</b> Anorexia with $\leq$ 15% weight<br>loss from pre-treatment<br>baseline / nausea &/or vomiting<br>requiring antiemetics/<br>abdominal pain requiring<br>analgesics             | <b>3</b> Anorexia with >15% wt loss<br>from pre-treatment baseline or<br>requiring N-G tube or parenteral<br>support. Nausea or vomiting<br>requiring tube or parenteral<br>support / abdominal pain,<br>severe despite medication /<br>hematemesis or melena /<br>abdominal distention (flat plate<br>radiograph demonstrates<br>distended bowel loops) | <b>4</b> Ileus, subacute or acute<br>obstruction, perforation, GI<br>bleeding requiring<br>transfusion, abdominal<br>pain requiring tube<br>decompression or bowel<br>diversion |  |

|                                            |                                |                                                                                                                                                   |                                                                                                                                                           |                                                                                                                                                                                             |                                                                                                                                                                               |
|--------------------------------------------|--------------------------------|---------------------------------------------------------------------------------------------------------------------------------------------------|-----------------------------------------------------------------------------------------------------------------------------------------------------------|---------------------------------------------------------------------------------------------------------------------------------------------------------------------------------------------|-------------------------------------------------------------------------------------------------------------------------------------------------------------------------------|
| <b>Lower G.I. including pelvis</b>         | <b>0</b> normal                | <b>1</b> Increased frequency or change in quality of bowel habits not requiring medication/rectal discomfort not requiring analgesics.            | <b>2</b> Diarrhea requiring parasympatholytic drugs /mucous discharge not necessitating sanitary pads/rectal or abdominal pain requiring analgesics.      | <b>3</b> Diarrhea requiring parenteral support/severe mucous or blood discharge necessitating sanitary pads/abdominal distention (flat plate radiograph demonstrates distended bowel loops) | <b>4</b> Acute or subacute obstruction, fistula or perforation; GI bleeding requiring transfusion; abdominal pain or tenesmus requiring tube decompression or bowel diversion |
| <b>Liver</b>                               | <b>0</b> normal                | <b>1</b> Mild lassitude; nausea, dyspepsia, slightly abnormal liver function,                                                                     | <b>2</b> Moderate symptoms; some abnormal liver function tests; serum albumin normal                                                                      | <b>3</b> Disabling hepatic insufficiency; liver function tests grossly abnormal; low albumin; edema or ascites                                                                              | <b>4</b> Necrosis / Hepatic coma or encephalopathy                                                                                                                            |
| <b>Bilirubin</b>                           | <b>0</b> age norm (N)          | <b>1</b> > N – 1,5 x N                                                                                                                            | <b>2</b> > 1,5 – 3,0 x N                                                                                                                                  | <b>3</b> > 3,0 – 10,0 x N                                                                                                                                                                   | <b>4</b> > 10,0 x N                                                                                                                                                           |
| <b>S-GOT / S-GPT</b>                       | <b>0</b> age norm (N)          | <b>1</b> > N – 2,5 x N                                                                                                                            | <b>2</b> > 2,5 – 5,0 x N                                                                                                                                  | <b>3</b> > 5,0 – 20,0 x N                                                                                                                                                                   | <b>4</b> > 20,0 x N                                                                                                                                                           |
| <b>Genitourinary (and kidneys)</b>         | <b>0</b> normal                | <b>1</b> Frequency of urination or nocturia twice pre-treatment habit / dysuria, urgency not requiring medication                                 | <b>2</b> Frequency of urination or nocturia that is less frequent than every hour. Dysuria, urgency, bladder spasm requiring local anesthetic             | <b>3</b> Frequency with urgency and nocturia hourly or more frequently/dysuria, pelvic pain or bladder spasm requiring regular, frequent narcotic/gross hematuria with/without clot passage | <b>4</b> Hematuria requiring transfusion/acute bladder obstruction not secondary to clot passage, ulceration, or necrosis.                                                    |
| <b>Creatinin (mg%)</b>                     | <b>0</b> age norm              | <b>1</b> > N – 1,5 x N                                                                                                                            | <b>2</b> > 1,5 – 3,0 x N                                                                                                                                  | <b>3</b> > 3,0 – 6,0 x N                                                                                                                                                                    | <b>4</b> > 6,0 x N                                                                                                                                                            |
| <b>Creatinin-Clearence</b>                 | > 90                           | 60 – 89                                                                                                                                           | 40 – 59                                                                                                                                                   | 20 – 39                                                                                                                                                                                     | < 19                                                                                                                                                                          |
| <b>Proteinuria (g/i)</b>                   | none                           | < 3                                                                                                                                               | 3 – 10,0                                                                                                                                                  | > 10,0                                                                                                                                                                                      | Nephrotic Syndrome                                                                                                                                                            |
| <b>Hematuria</b>                           | none                           | microscopic                                                                                                                                       | macroscopic without clot passage                                                                                                                          | macroscopic with clot passage                                                                                                                                                               | Transfusion necessary                                                                                                                                                         |
| <b>Urethra and bladder</b>                 | <b>0</b> normal                | <b>1</b> mild mucosa atrophy, small area of teleangiectasiae, microscopic hematuria, mild strengthened urinary urge                               | <b>2</b> moderate altered urinary urge (>6 times / day), generalized teleangiectasiae, sometimes macrohematuria,                                          | <b>3</b> severe altered urinary urge, (>1/hour), dysuria, often hematuria                                                                                                                   | <b>4</b> necrosis, perforation, fistula, severe bladder contracture                                                                                                           |
| <b>Bones</b>                               | <b>0</b> normal                | <b>1</b> no symptoms, no growth retardation, mild reduced bone density                                                                            | <b>2</b> Moderate pain or tension; moderate growth impairment, irregular bone sclerosis                                                                   | <b>3</b> severe pain or tension, complete growth inhibition, thick bone sclerosis                                                                                                           | <b>4</b> necrosis, osteoradionecrosis, spontaneous fracture                                                                                                                   |
| <b>Joints</b>                              | <b>0</b> normal                | <b>1</b> mild joint stiffness, no symptoms or mild function impairment                                                                            | <b>2</b> Moderate joint stiffness, intermediate joint pain, moderate function impairment                                                                  | <b>3</b> severe joint stiffness, severe joint pain, severe function impairment                                                                                                              | <b>4</b> necrosis, complete ankylosis, complete function impairment                                                                                                           |
| <b>CNS (brain)</b>                         | <b>0</b> normal                | <b>1</b> complete functional status with mild neurological impairment; no specific therapy necessary                                              | <b>2</b> moderate neurological impairment; supportive care and medication (incl. steroids or anticonvulsives) necessary                                   | <b>3</b> severe neurological impairment, high-dose steroids necessary, need for hospitalization                                                                                             | <b>4</b> life-threatening neurological impairment, >3 seizures per week despite of medication                                                                                 |
| <b>Peripheral nerves incl. spinal cord</b> | <b>0</b> normal                | <b>1</b> mild L'Hermitte's syndrome, paraesthesiae                                                                                                | <b>2</b> marked L'Hermitte's syndrome with paraesthesiae and muscle weakness                                                                              | <b>3</b> objective segmental neurological function loss, with paresis or paraesthesiae                                                                                                      | <b>4</b> mono-, para- or quadraplegia                                                                                                                                         |
| <b>Eyes</b>                                | <b>0</b> no change             | <b>1</b> Mild conjunctivitis with or without scleral injection/increased tearing                                                                  | <b>2</b> Moderate conjunctivitis with or without keratitis requiring steroids &/or antibiotics/dry eye requiring artificial tears/iritis with photophobia | <b>3</b> Severe keratitis with corneal ulceration/objective decrease in visual acuity or in visual fields/ acute glaucoma/ panophthalmitis                                                  | <b>4</b> Loss of vision (unilateral or bilateral)                                                                                                                             |
| <b>Ears</b>                                | <b>0</b> no change or baseline | <b>1</b> Mild external otitis with erythema, pruritis, secondary to dry desquamation not requiring medication. Audiogram unchanged from baseline. | <b>2</b> Moderate external otitis requiring topical medication / serous otitis medius / hypoacusis on testing only                                        | <b>3</b> Severe external otitis with discharge or moist desquamation / symptomatic hypoacusis/tinnitus, not drug related                                                                    | <b>4</b> Deafness                                                                                                                                                             |

**Adapted from:** Cox JD, Stetz J, Pajak TF. Toxicity criteria of the Radiation Therapy Oncology Group (RTOG) and the European Organization for Research and Treatment of Cancer (EORTC). Int J Radiat Oncol Biol Phys 1995;31:1341-1346.

.....

Name of Physician

Signature / Stamp of Department

| <input type="text"/> <input type="text"/> <input type="text"/> <input type="text"/><br>No.      Date |                                                                     | Late side effects after radiotherapy in childhood (RTOG/EORTC)                                                                                                   |                                                                                                                                                                                                                  |                                                                                                                                                                                                                                             | Pat.name, DOB                                                                                                                                                                          |  |
|------------------------------------------------------------------------------------------------------|---------------------------------------------------------------------|------------------------------------------------------------------------------------------------------------------------------------------------------------------|------------------------------------------------------------------------------------------------------------------------------------------------------------------------------------------------------------------|---------------------------------------------------------------------------------------------------------------------------------------------------------------------------------------------------------------------------------------------|----------------------------------------------------------------------------------------------------------------------------------------------------------------------------------------|--|
| Status                                                                                               | Complete remission                                                  | Progression                                                                                                                                                      | Secondary malignancy                                                                                                                                                                                             | Death                                                                                                                                                                                                                                       | Date of death:                                                                                                                                                                         |  |
| <b>General status, Karnofsky-Index</b>                                                               | <b>0</b> normal<br>KI: 100%                                         | <b>1</b> Mild reduced activity,<br>KI: 70–80%                                                                                                                    | <b>2</b> Reduced activity and power,<br>KI: 50–60%                                                                                                                                                               | <b>3</b> Severe reduced activity and power,<br>KI: 30–40%                                                                                                                                                                                   | <b>4</b> Life threatened,<br>KI: < 30%                                                                                                                                                 |  |
| <b>Hb (g/dl)</b>                                                                                     | <b>0</b> age norm                                                   | <b>1</b> 10,0 - < N                                                                                                                                              | <b>2</b> 8 - < 10,0                                                                                                                                                                                              | <b>3</b> 6,5 - < 8,0                                                                                                                                                                                                                        | <b>4</b> < 6,5                                                                                                                                                                         |  |
| <b>Leukocytes (N/μl)</b>                                                                             | <b>0</b> ≥ 4.000                                                    | <b>1</b> 3.000 - < 4.000                                                                                                                                         | <b>2</b> 2.000 - < 3.000                                                                                                                                                                                         | <b>3</b> 1.000 - < 2.000                                                                                                                                                                                                                    | <b>4</b> < 1.000                                                                                                                                                                       |  |
| <b>Thrombocytes (1000/μl)</b>                                                                        | <b>0</b> ≥ 100                                                      | <b>1</b> 75 - < 100                                                                                                                                              | <b>2</b> 50 - < 75                                                                                                                                                                                               | <b>3</b> 10 - < 50                                                                                                                                                                                                                          | <b>4</b> < 10                                                                                                                                                                          |  |
| <b>Skin</b>                                                                                          | <b>0</b> normal                                                     | <b>1</b> Slight atrophy, pigmentation change, some hair loss                                                                                                     | <b>2</b> Patch atrophy, moderate teleangiectasia (≤ 50%), total hair loss                                                                                                                                        | <b>3</b> Marked atrophy, gross teleangiectasia (> 50%)                                                                                                                                                                                      | <b>4</b> ulceration, necrosis, (surgical intervention necessary)                                                                                                                       |  |
| <b>Subcutaneous tissue</b>                                                                           | <b>0</b> normal                                                     | <b>1</b> mild asymptomatic fibrosis, without contractures, slight reduced subcutaneous fat                                                                       | <b>2</b> moderate asymptomatic fibrosis with ≤ 10% linear contracture, moderate reduced subcutaneous fat                                                                                                         | <b>3</b> severe (symptomatic) fibrosis with > 10% linear contractures, severe reduced subcutaneous fat                                                                                                                                      | <b>4</b> ulceration, necrosis, (surgical intervention necessary)                                                                                                                       |  |
| <b>Mucous membrane</b>                                                                               | <b>0</b> normal                                                     | <b>1</b> Slight atrophy or dryness                                                                                                                               | <b>2</b> moderate atrophy and teleangiectasia, reduced production of mucous                                                                                                                                      | <b>3</b> Marked atrophy and teleangiectasia, loss of mucous production                                                                                                                                                                      | <b>4</b> ulceration, necrosis, (surgical intervention necessary)                                                                                                                       |  |
| <b>Salivary glands</b>                                                                               | <b>0</b> normal                                                     | <b>1</b> Slight dryness, good response on stimulation (normal food possible)                                                                                     | <b>2</b> moderate dryness of mouth, poor response on stimulation (much fluid, pulpy food)                                                                                                                        | <b>3</b> complete dryness of mouth, no response on stimulation (no solid food, fluid food)                                                                                                                                                  | <b>4</b> Fibrosis (complete atrophy) (parenteral nutrition, PEG)                                                                                                                       |  |
| <b>Pharynx/ Esophagus</b>                                                                            | <b>0</b> normal                                                     | <b>1</b> mild fibrosis, slight dysphagia regarding solid food, no pain at swallow (normal nutrition)                                                             | <b>2</b> moderate fibrosis, no normal nutrition, pulpy food, perhaps dilatation necessary                                                                                                                        | <b>3</b> severe fibrosis (or dysphagia), only fluids possible, dilatation necessary, pain at swallow                                                                                                                                        | <b>4</b> necrosis, perforation, fistula (surgical intervention necessary or PEG/parenteral nutrition)                                                                                  |  |
| <b>Larynx</b>                                                                                        | <b>0</b> normal                                                     | <b>1</b> (mild) hoarseness (or cough), mild laryngeal edema                                                                                                      | <b>2</b> moderate hoarseness or cough, moderate laryngeal edema, chondritis (symptomatic therapy)                                                                                                                | <b>3</b> severe hoarseness, severe laryngeal edema, massive chondritis, intensive local therapy, analgesics                                                                                                                                 | <b>4</b> necrosis, (massive dyspnoea and stridor, ulceration, intubation or tracheotomy)                                                                                               |  |
| <b>Lung</b>                                                                                          | <b>0</b> normal<br>pO <sub>2</sub> : > 85;<br>pCO <sub>2</sub> < 40 | <b>1</b> no or mild symptoms (dry cough); few radiological signs (mild exercise-induced shortness of breath)<br>pO <sub>2</sub> :71-85; pCO <sub>2</sub> : 41-50 | <b>2</b> moderate symptomatic lung fibrosis or pneumonitis (massive cough); ,mild fever; radiological signs; (moderate exercise-induced shortness of breath)<br>pO <sub>2</sub> :61-70; pCO <sub>2</sub> : 51-60 | <b>3</b> Severe symptomatic lung fibrosis or pneumonitis, massive radiological signs; (severe shortness of breath)<br>pO <sub>2</sub> :51-60; pCO <sub>2</sub> : 61-70 (intensive medication)                                               | <b>4</b> Massive respiratory insufficiency; permanent O <sub>2</sub> -application and controlled ventilation<br>pO <sub>2</sub> < 50; pCO <sub>2</sub> > 70 (intensive care necessary) |  |
| <b>Heart</b>                                                                                         |                                                                     |                                                                                                                                                                  |                                                                                                                                                                                                                  |                                                                                                                                                                                                                                             |                                                                                                                                                                                        |  |
| <b>Arrhythmia</b>                                                                                    | <b>0</b> none                                                       | <b>1</b> Asymptomatic, no therapy                                                                                                                                | <b>2</b> recurrent / persistent, no therapy                                                                                                                                                                      | <b>3</b> Therapy required                                                                                                                                                                                                                   | <b>4</b> Hypotension, ventricular Arrhythmia, defibrillation                                                                                                                           |  |
| <b>Cardiac function</b>                                                                              | <b>0</b> normal                                                     | <b>1</b> Asymptomat. EF ↓ (at rest) > = 10 % but < 20 % of baseline value                                                                                        | <b>2</b> Asymptomat., but EF ↓ (at rest) under upper limit for EF (work) or EF ↓ > = 20 % of baseline value                                                                                                      | <b>3</b> Mild CHF, compensated by therapy                                                                                                                                                                                                   | <b>4</b> severe / refractive CHF or need for intubation                                                                                                                                |  |
| <b>Echocardio: LV-SF %</b>                                                                           | <b>0</b> > = 30                                                     | <b>1</b> > = 24 - < 30                                                                                                                                           | <b>2</b> > = 20 - < 24                                                                                                                                                                                           | <b>3</b> > 15 - < 20                                                                                                                                                                                                                        | <b>4</b> < = 15                                                                                                                                                                        |  |
| <b>Upper G.I.</b>                                                                                    | <b>0</b> normal                                                     | <b>1</b> Mild anorexia (≤ 5% weight loss); nausea; (once vomiting); mild abdominal pain;: no specific therapy                                                    | <b>2</b> moderate anorexia (≤ 15% weight loss); nausea or vomiting (2-5x), antiemetics necessary; moderate abdominal pain: mild parasympatholytics or analgesics necessary                                       | <b>3</b> Massive anorexia (> 15% weight loss); nausea and vomiting (6-10x); NG-/PEG-probe or parenteral nutrition necessary; severe abdominal pain despite medication; hematemesis, melena; massive meteorism (X-Ray: extended bowel loops) | <b>4</b> necrosis; perforation, fistula; complete obstruction (ileus); GI-bleeding; PEG or parenteral nutrition, transfusions, surgery necessary                                       |  |
| <b>Lower G.I: Bowel and colon</b>                                                                    | <b>0</b> normal                                                     | <b>1</b> Mildly reduced stool consistence, mild spasms; stool ≤ 5x/day; mild slime or blood loss                                                                 | <b>2</b> Markedly reduced stool consistence, spasms; stool > 5x/day; moderate slime and blood loss                                                                                                               | <b>3</b> Massive heightened stool frequency, bowel obstructions needing surgical intervention, ileus or bleeding                                                                                                                            | <b>4</b> necrosis; perforation, fistula; (other life-threatening bowel complications)                                                                                                  |  |



|                                            |                       |                                                                                                                    |                                                                                                                         |                                                                                                                                          |                                                                                                             |
|--------------------------------------------|-----------------------|--------------------------------------------------------------------------------------------------------------------|-------------------------------------------------------------------------------------------------------------------------|------------------------------------------------------------------------------------------------------------------------------------------|-------------------------------------------------------------------------------------------------------------|
| <b>Liver</b>                               | <b>0</b> normal       | <b>1</b> mild lassitude, nausea, dyspepsia                                                                         | <b>2</b> moderate symptoms (tiredness, nausea, dyspepsia)                                                               | <b>3</b> severe liver insufficiency                                                                                                      | <b>4</b> liver necrosis, hepatic coma or encephalopathy; (parenteral nutrition, portocaval shunt necessary) |
| <b>Bilirubin</b>                           | <b>0</b> age norm (N) | <b>1</b> > N – 1,5 x N                                                                                             | <b>2</b> > 1,5 – 3,0 x N                                                                                                | <b>3</b> > 3,0 – 10,0 x N                                                                                                                | <b>4</b> > 10,0 x N                                                                                         |
| <b>S-GOT / S-GPT</b>                       | <b>0</b> age norm (N) | <b>1</b> > N – 2,5 x N                                                                                             | <b>2</b> > 2,5 – 5,0 x N                                                                                                | <b>3</b> > 5,0 – 20,0 x N                                                                                                                | <b>4</b> > 20,0 x N                                                                                         |
| <b>Creatinin (mg%)</b>                     | <b>0</b> age norm     | <b>1</b> > N – 1,5 x N                                                                                             | <b>2</b> > 1,5 – 3,0 x N                                                                                                | <b>3</b> > 3,0 – 6,0 x N                                                                                                                 | <b>4</b> > 6,0 x N                                                                                          |
| <b>Creatinin-Clearance</b>                 | > 90                  | 60 – 89                                                                                                            | 40 – 59                                                                                                                 | 20 – 39                                                                                                                                  | < 19                                                                                                        |
| <b>Proteinuria (g/i)</b>                   | none                  | < 3                                                                                                                | 3 – 10,0                                                                                                                | > 10,0                                                                                                                                   | Nephrotic Syndrome                                                                                          |
| <b>Hematuria</b>                           | none                  | microscopic                                                                                                        | macroscopic without clot passage                                                                                        | macroscopic with clot passage                                                                                                            | Transfusion necessary                                                                                       |
| <b>Urethra and bladder</b>                 | <b>0</b> normal       | <b>1</b> mild mucosa atrophy, small area of teleangiectasia, microscopic hematuria, mild strengthened urinary urge | <b>2</b> moderate altered urinary urge (>6 times / day), generalized teleangiectasia, sometimes macrohematuria,         | <b>3</b> severe altered urinary urge, (>1/hour), dysuria, often hematuria                                                                | <b>4</b> necrosis, perforation, fistula, severe bladder contracture                                         |
| <b>Bones</b>                               | <b>0</b> normal       | <b>1</b> no symptoms, no growth retardation, mild reduced bone density                                             | <b>2</b> Moderate pain or tension; moderate growth impairment, irregular bone sclerosis                                 | <b>3</b> severe pain or tension, complete growth inhibition, thick bone sclerosis                                                        | <b>4</b> necrosis, osteoradionecrosis, spontaneous fracture                                                 |
| <b>Joints</b>                              | <b>0</b> normal       | <b>1</b> mild joint stiffness, no symptoms or mild function impairment                                             | <b>2</b> Moderate joint stiffness, intermediate joint pain, moderate function impairment                                | <b>3</b> severe joint stiffness, severe joint pain, severe function impairment                                                           | <b>4</b> necrosis, complete ankylosis, complete function impairment                                         |
| <b>Function of irradiated extremity</b>    | <b>0</b> normal       | <b>1</b> mild function impairment, normal daily activities possible.                                               | <b>2</b> moderate functional impairment at daily activities.                                                            | <b>3</b> Severe functional impairment.                                                                                                   | <b>4</b> Loss of function                                                                                   |
| <b>Brain, Central nervous system</b>       | <b>0</b> normal       | <b>1</b> Mild headache, mild lethargia (mild neurological impairment)                                              | <b>2</b> Moderate headache, obvious lethargia (somnolence < 50% / day); moderate neurological impairment                | <b>3</b> Severe headache and severe CNS-impairment, e.g. power loss or dyskinesia (and somnolence > 50%); severe neurological impairment | <b>4</b> seizures or paralyses, unconsciousness (massive or life-threatening neurological impairment)       |
| <b>Peripheral nerves incl. spinal cord</b> | <b>0</b> normal       | <b>1</b> mild L'Hermitte's syndrome, paraesthesiae                                                                 | <b>2</b> marked L'Hermitte's syndrome with paraesthesiae and muscle weakness                                            | <b>3</b> objective segmental neurological function loss, with paresis or paraesthesiae                                                   | <b>4</b> mono-, para- or quadraplegia                                                                       |
| <b>Eyes</b>                                | <b>0</b> normal       | <b>1</b> asymptomatic cataract, mild corneal ulceration or ceratitis (and / or conjunctivitis)                     | <b>2</b> Symptomatic cataract; moderate corneal ulceration (ceratitis); moderate retinopathy or glaucoma                | <b>3</b> Severe ceratitis (ulceration), severe retinopathy with retinal detachment; severe glaucoma                                      | <b>4</b> Massive ophthalmologic impairment; panophthalmitis; (uni-/bilateral visual loss)                   |
| <b>Ears</b>                                | <b>0</b> normal       | <b>1</b> mild external otitis with atrophy or fibrosis; no therapy; audiogram: hearing loss < 10 dB                | <b>2</b> Moderate external otitis with atrophy or fibrosis; tinnitus; local therapy; moderate hearing loss (10 - 15 dB) | <b>3</b> Severe external et medial otitis; (continuous tinnitus not due to medication); severe hearing loss (> 15 - 20 dB)               | <b>4</b> Severe osteochondritis, ulceration, necrosis; complete hearing loss on one or both sides (> 20 dB) |

**Adapted from:** Cox JD, Stetz J, Pajak TF. Toxicity criteria of the Radiation Therapy Oncology Group (RTOG) and the European Organization for Research and Treatment of Cancer (EORTC). Int J Radiat Oncol Biol Phys 1995;31:1341-1346.

**Comments:**.....

**Growth/Puberty:**

Height in cm: \_\_\_\_\_ Height if seated in cm: \_\_\_\_\_

Weight in kg: \_\_\_\_\_

Scoliosis:  no  yes

Deformation of bones or soft tissue:  no  yes, localization:.....

Description: .....

.....

**Puberty development (after irradiation of brain, pelvis or upper part of lower extremity):**

**Girls** :Menarche:  no  yes Blood values: LH: .....

FSH: .....

Tanner stage breast:..... Estradiol: .....

Tanner stage hair ..... Prolaktin: .....

**Boys:** Tanner stage male genitals:..... Blood values: LH: .....

Tanner stage hair:..... FSH: .....

Volume testes: ..... Testosterone: .....

Prolaktin: .....

**Blood values of the thyroid gland (after RT of head/neck/mediastinum):**

TSH basal: \_\_\_\_\_μE / ml

fT4: \_\_\_\_\_ng / dl

fT3: \_\_\_\_\_ng/dl

Date:\_\_\_\_\_

**Current medication for thyroid gland:**

Name:\_\_\_\_\_

Dosage:\_\_\_\_\_

**After RT of CNS:**

neurocognitive test performed:  no  yes

pathological result:  no  yes

.....  
Name of Physician

.....  
Signature / Stamp of Department.
